# Supplementary material for: Solid–vapour reactions as a post-synthetic modification tool for molecular crystals: the enclathration of benzene and toluene by Werner complexes
Source: Royal Society of Chemistry journal article supplement (doi:10.1039/c3cc40521d), 2013-01-01
Supplement: c3cc40521d.pdf [file c3cc40521d.pdf]

## Supplementary Information

### 1. Solution synthesis

**1** was obtained by adding 4 equivalents of 4-PhPy to one equivalent of Ni(NCS)<sub>2</sub> in methanol (0.1 M solution). The synthesis of the inclusion compounds was attempted by adding 4 equivalents of 4-PhPy dissolved in the minimum amount of the aromatic solvent (either benzene or toluene), to one equivalent of Ni(NCS)<sub>2</sub> in methanol (0.1 M solution). Crystal growth was attempted by slow solvent evaporation.

### 2. Solid-vapour enclathration

The solid-vapour reactions under kinetic control were carried out by exposing about 5 mg of microcrystalline **1** to the solvent vapours in a customised microbalance that monitors weight change as a function of time under controlled conditions of temperature and pressure.

Isothermal sorption measurements for **1** were conducted in a ASAP 2020 sorption analyser.

### 3. Solid-liquid enclathration

The solid-liquid enclathrations were carried out by covering 5 mg of **1** with 5 ml of benzene and toluene respectively.

### 4. Crystallographic data

Single crystal X-ray diffraction data were collected on a Bruker Apex II Duo diffractometer employing Mo-K $\alpha$  radiation. The temperature was controlled using an Oxford Cryostream cooler. Data reduction and absorption corrections were carried out using the SAINT<sup>1</sup> and SADABS<sup>2,3</sup> software packages, respectively. The structures were solved by direct methods using SHELXS-97.<sup>4</sup> Non-hydrogen atoms were refined anisotropically by means of full-matrix least squares calculations on  $F^2$  using SHELXL-97<sup>4</sup> within the X-Seed<sup>5</sup> graphical user interface. Hydrogen atoms were placed on calculated positions.

Crystal data for **1bnz**: C<sub>52</sub>H<sub>42</sub>N<sub>6</sub>NiS<sub>2</sub>,  $M = 873.75$ , light blue plates,  $0.20 \times 0.07 \times 0.07$  mm<sup>3</sup>, triclinic, space group  $P-1$  (No. 2),  $a = 13.039(4)$ ,  $b = 13.178(4)$ ,  $c = 21.477(7)$  Å,  $\alpha = 85.204(4)$ ,  $\beta = 79.744(4)$ ,  $\gamma = 64.519(3)^\circ$ ,  $V = 3278.1(18)$  Å<sup>3</sup>,  $Z = 3$ ,  $D_c = 1.328$  g/cm<sup>3</sup>,  $F_{000} =$

1368, MoK $\alpha$  radiation,  $\lambda = 0.71073 \text{ \AA}$ ,  $T = 100(2)\text{K}$ ,  $2\theta_{\text{max}} = 57.5^\circ$ , 38688 reflections collected, 15449 unique ( $R_{\text{int}} = 0.1606$ ). Final  $Goof = 0.993$ ,  $RI = 0.1252$ ,  $wR2 = 0.2971$ ,  $R$  indices based on 5396 reflections with  $I > 2\sigma(I)$  (refinement on  $F^2$ ), 807 parameters, 48 restraints. Lp and absorption corrections applied,  $\mu = 0.583 \text{ mm}^{-1}$ . 9 Uiso/Uij restrained atom sites, and 48 least-squares restraints were used in the refinement to model the geometry of the guest (SIMU 0.1 and AFIX 66).

Crystal data for **1bnz2**:  $\text{C}_{58}\text{H}_{48}\text{N}_6\text{NiS}_2$ ,  $M = 951.85$ , blue plate,  $0.30 \times 0.20 \times 0.10 \text{ mm}^3$ , monoclinic, space group  $P2_1/c$  (No. 14),  $a = 18.502(2)$ ,  $b = 11.9483(14)$ ,  $c = 23.881(3) \text{ \AA}$ ,  $\beta = 111.591(2)^\circ$ ,  $V = 4908.9(10) \text{ \AA}^3$ ,  $Z = 4$ ,  $D_c = 1.288 \text{ g/cm}^3$ ,  $F_{000} = 1992$ , MoK $\alpha$  radiation,  $\lambda = 0.71073 \text{ \AA}$ ,  $T = 100(2)\text{K}$ ,  $2\theta_{\text{max}} = 57.8^\circ$ , 29142 reflections collected, 11644 unique ( $R_{\text{int}} = 0.1029$ ). Final  $Goof = 0.859$ ,  $RI = 0.0651$ ,  $wR2 = 0.1522$ ,  $R$  indices based on 5725 reflections with  $I > 2\sigma(I)$  (refinement on  $F^2$ ), 604 parameters, 0 restraints. Lp and absorption corrections applied,  $\mu = 0.525 \text{ mm}^{-1}$ .

Crystal data for **1tol I**:  $\text{C}_{60}\text{H}_{52}\text{N}_6\text{NiS}_2$ ,  $M = 979.91$ , light blue needle,  $0.30 \times 0.30 \times 0.10 \text{ mm}^3$ , orthorhombic, space group  $Fdd2$  (No. 43),  $a = 43.6737(9)$ ,  $b = 10.2287(2)$ ,  $c = 22.9715(4) \text{ \AA}$ ,  $V = 10261.9(3) \text{ \AA}^3$ ,  $Z = 8$ ,  $D_c = 1.269 \text{ g/cm}^3$ ,  $F_{000} = 4112$ , MoK $\alpha$  radiation,  $\lambda = 0.71073 \text{ \AA}$ ,  $T = 100(2)\text{K}$ ,  $2\theta_{\text{max}} = 69.1^\circ$ , 17282 reflections collected, 8191 unique ( $R_{\text{int}} = 0.0336$ ). Final  $Goof = 1.035$ ,  $RI = 0.0386$ ,  $wR2 = 0.0887$ ,  $R$  indices based on 7131 reflections with  $I > 2\sigma(I)$  (refinement on  $F^2$ ), 383 parameters, 1 restraint. Lp and absorption corrections applied,  $\mu = 0.505 \text{ mm}^{-1}$ . Absolute structure parameter = 0.375(9) (Flack, H. D. *Acta Cryst.* **1983**, A39, 876-881).

Crystal data for **1tol II**:  $\text{C}_{30}\text{H}_{26}\text{N}_3\text{Ni}_{0.50}\text{S}$ ,  $M = 489.95$ , light blue plate,  $0.12 \times 0.08 \times 0.08 \text{ mm}^3$ , monoclinic, space group  $C2/c$  (No. 15),  $a = 10.620(6)$ ,  $b = 23.084(12)$ ,  $c = 22.693(12) \text{ \AA}$ ,  $\beta = 99.406(8)^\circ$ ,  $V = 5488(5) \text{ \AA}^3$ ,  $Z = 8$ ,  $D_c = 1.186 \text{ g/cm}^3$ ,  $F_{000} = 2056$ , MoK $\alpha$  radiation,  $\lambda = 0.71073 \text{ \AA}$ ,  $T = 293(2)\text{K}$ ,  $2\theta_{\text{max}} = 46.6^\circ$ , 11777 reflections collected, 3936 unique ( $R_{\text{int}} = 0.0726$ ). Final  $Goof = 1.071$ ,  $RI = 0.0760$ ,  $wR2 = 0.2223$ ,  $R$  indices based on 2447 reflections with  $I > 2\sigma(I)$  (refinement on  $F^2$ ), 288 parameters, 0 restraints. Lp and absorption corrections applied,  $\mu = 0.472 \text{ mm}^{-1}$ .

## 5. PXRD

All diffraction patterns were recorded on a PANalytical XPERT-PRO diffractometer system using Bragg-Brentano geometry and an incident beam of Cu K $\alpha$  radiation ( $\lambda = 1.5418 \text{ \AA}$ ). A sheet of beryllium was used to cover the sample to avoid the evaporation of solvent during the diffraction analysis.

Time-lapsed structural analysis for the solid-vapour reaction was performed off site by collecting PXRD patterns at different times during the reaction as described at point 2.

Time-lapsed structural analysis for the solid-liquid reaction was performed *in situ* by placing about 5 mg of microcrystalline **1** on a silicon sample holder and by layering the sample with about 2 ml of toluene.

## 6. Figures

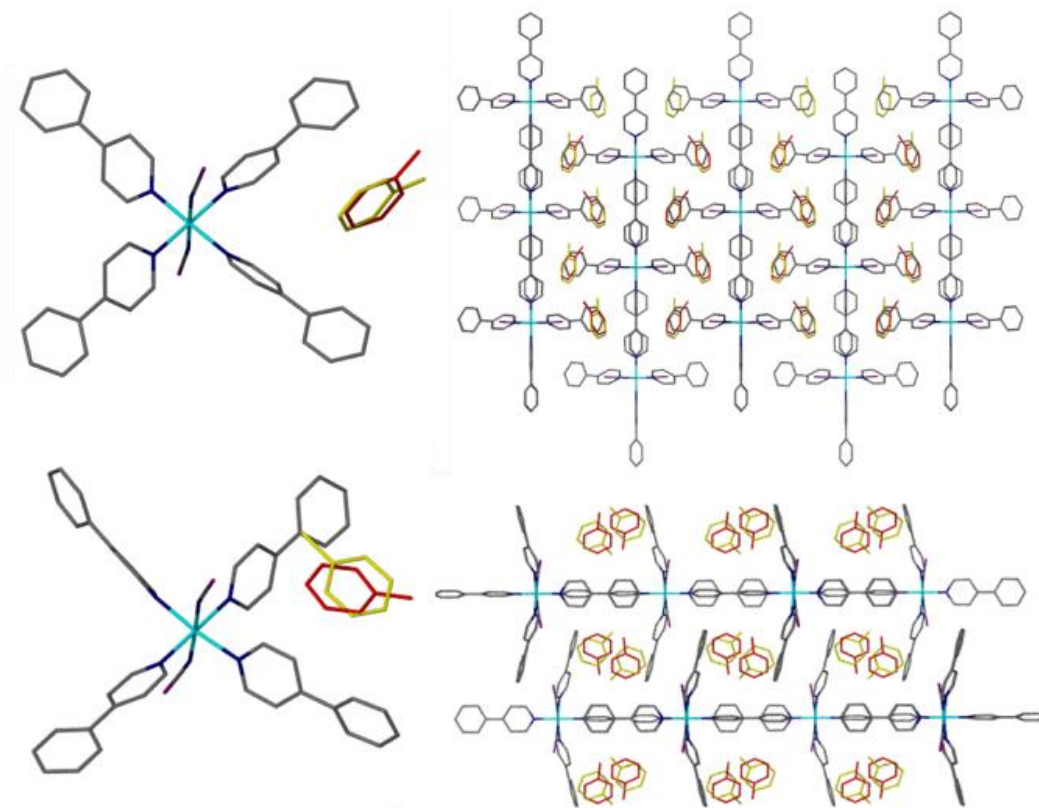

**Figure 1:** Molecular and unit cell structure of **1tol**: form 1 (top) and form 2 (bottom). Hydrogen atoms are omitted for clarity. The two possible position of toluene are indicated in blue and red. Thermal ellipsoids are reported for the metal complex

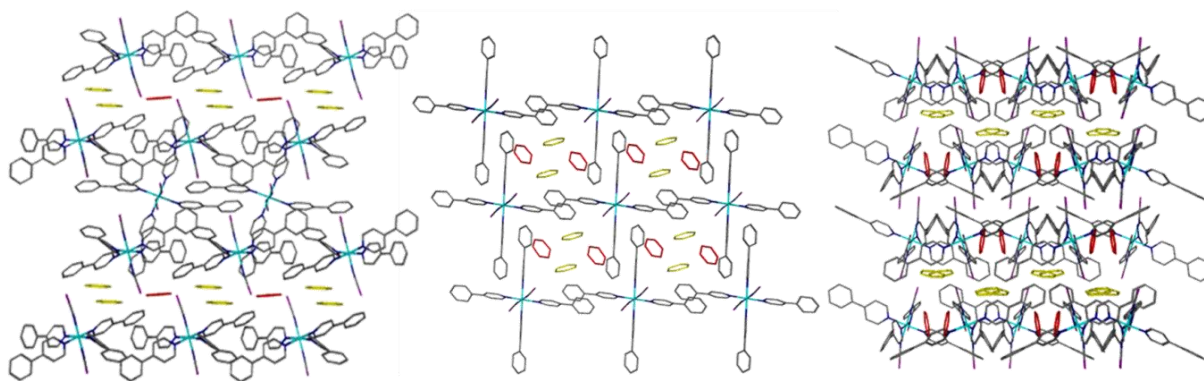

**Figure 2:** crystal packing of **1bnz** (left), and **1bnz4** (middle) and **bnz2** (right). Hydrogens are omitted for clarity and symmetry independent benzene molecules are coloured in red and yellow.

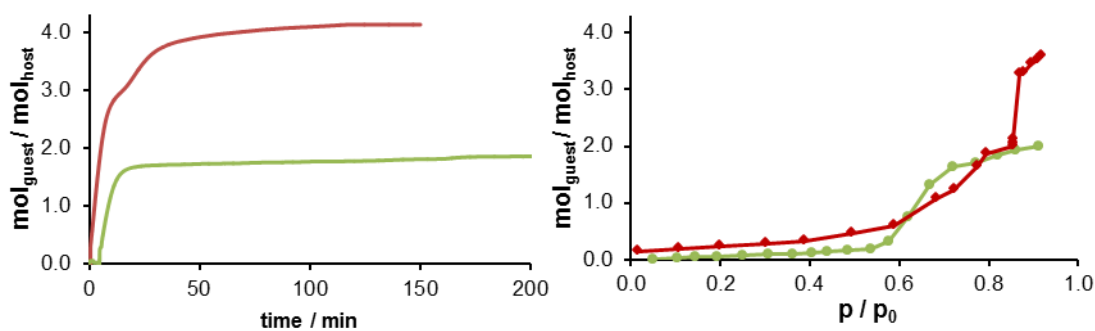

**Figure 3:** measurements of the solid-vapour reaction between **1** and benzene (red), and toluene (green) under kinetic (left) and thermodynamic (right) conditions.

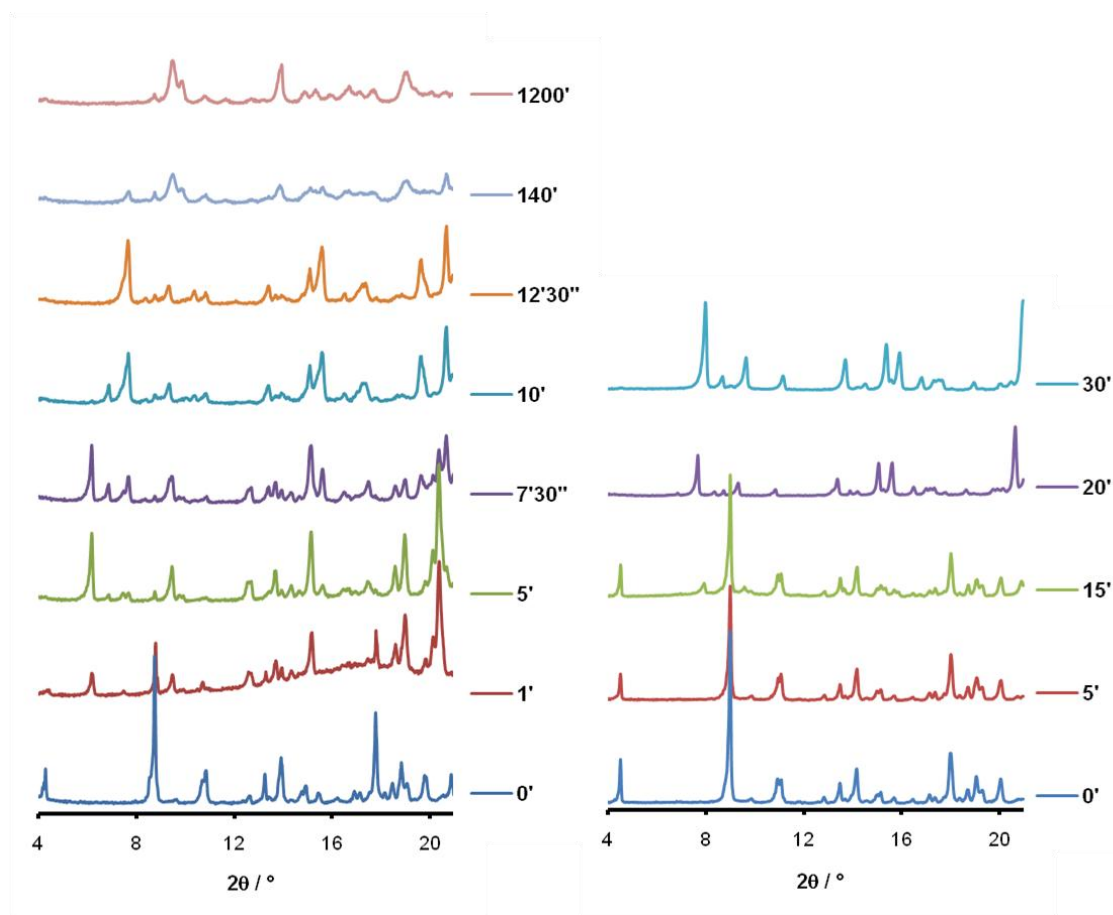

**Figure 4:** Time lapse PXRD of the solvent absorption (left) and vapour absorption (right) processes by **1**.

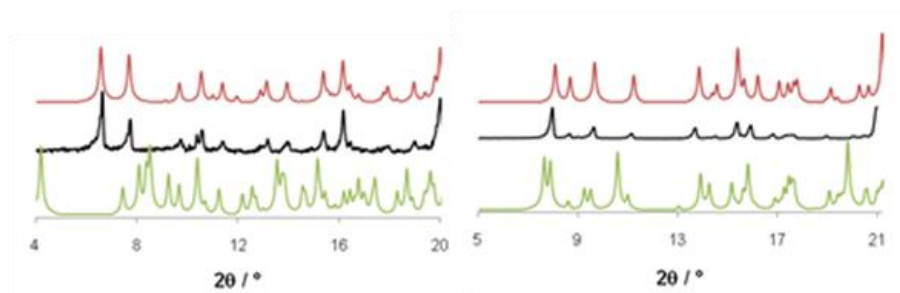

**Figure S1:** comparison of PXRD pattern. Left: calculated for **1** (green); measured for the product of the solid-vapour reaction with benzene (black); Calculated for **1bnz4** (red). Right: cacluated for **1tol II** (green); measured for the product of the solid-vapour reaction with toluene (black); cacluated for **1tol I** (red).
